# Supplementary material for: Composition and cycling of dissolved organic matter from tropical peatlands of coastal Sarawak, Borneo, revealed by fluorescence spectroscopy and parallel factor analysis
Source: Copernicus journal article supplement (doi:10.5194/bg-16-2733-2019), 2019-07-12
Supplement: Supplementary file 1 [file bg-16-2733-2019-supplement.zip]

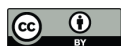

## *Supplement of*

# **Composition and cycling of dissolved organic matter from tropical peatlands of coastal Sarawak, Borneo, revealed by fluorescence spectroscopy and parallel factor analysis**

**Yongli Zhou et al.**

*Correspondence to:* Yongli Zhou (zhou0303@e.ntu.edu.sg)

- bg-16-2733-2019-supplement-title-page.pdf
- resubmitted suppl bg2018-508
  - Figure S1 correlation between CDOM parameters and FDOM.pdf
  - Figure S2 EEM spectrum of photobleaching sample.pdf
  - Figure S3 Samples with A<sub>total</sub> higher than 1.5.pdf
  - Figure S4 spectra loadings of the split dataset.pdf
  - Supplementary Data Table 1.xlsx
  - Supplementary Data Table 2\_OpenFluorSearch\_\_Yongli Sarawak FDOM\_20190210.csv
  - Supplementary Information 1\_Effect of NaN<sub>3</sub> blank on CDOM parameters.pdf

The copyright of individual parts of the supplement might differ from the CC BY 4.0 License.
