# Supplementary material for: Composition and cycling of dissolved organic matter from tropical peatlands of coastal Sarawak, Borneo, revealed by fluorescence spectroscopy and parallel factor analysis
Source: Copernicus journal article supplement (doi:10.5194/bg-16-2733-2019), 2019-07-12
Supplement: Supplementary file 3 [file bg-16-2733-2019-supplement.zip]

# Supplementary Information 1: Effect of $\text{NaN}_3$ blank on CDOM parameters

## 1. Contribution of $\text{NaN}_3$ to the total absorption coefficient

$\text{NaN}_3$  absorbs in the UV region at wavelengths lower than 300 nm (McDonald et al., 1970). Figure 1 shows the percentage contribution of our  $\text{NaN}_3$  blanks to the total Napierian absorption coefficient (*i.e.* CDOM +  $\text{NaN}_3$ ) from 250 – 320 nm for our dataset. The  $\text{NaN}_3$  accounts for 0 – 95% of the total absorption coefficient at 250 nm, but the blank contribution rapidly drops to mostly <15% at wavelengths above 270 nm, and essentially no contribution from  $\text{NaN}_3$  is observed at wavelengths above 310 nm.  $\text{NaN}_3$  did not contribute blank fluorescence.

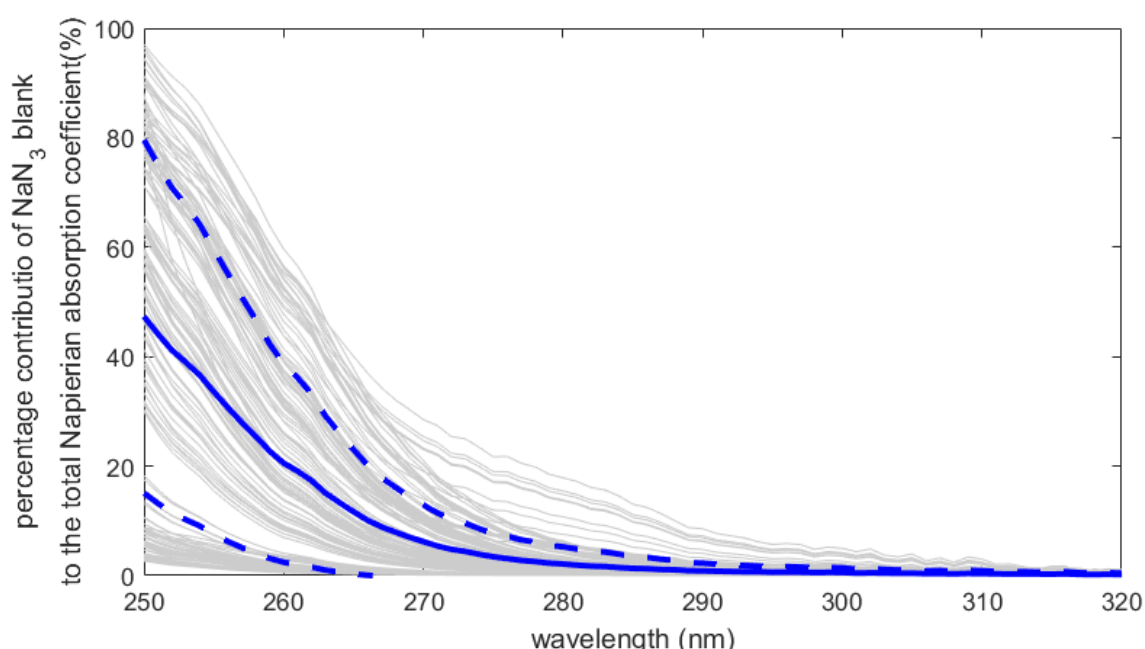

Figure 1. Compilation of the percentage contribution of  $\text{NaN}_3$  to the total absorption at each wavelength from 250 nm to 320 nm for all individual samples (grey solid lines), and the overall mean value for the whole dataset (blue solid line). The blue dashed lines show 1 standard deviation around the mean.

## 2. Uncertainty analysis of $\text{NaN}_3$ blank and effects on CDOM parameters

### 2.1 Uncertainty of $\text{NaN}_3$ concentration in the water sample

Subtracting the  $\text{NaN}_3$  blank absorption adds uncertainty to the sample CDOM spectrum, because of variability in the exact  $\text{NaN}_3$  concentration between samples. Here, we first estimate the uncertainty in  $\text{NaN}_3$  concentration in each sample, and thus the uncertainty in the CDOM spectrum of each sample. We then analyze the degree to which this uncertainty affects the estimates of specific UV absorbance ( $\text{SUVA}_{254}$ ) and UV spectral slope ( $S_{275-295}$ ) used in the

present paper and in Martin et al. (2018).

As the CDOM absorption coefficients were derived by subtracting the  $\text{NaN}_3$  blank from the total absorption coefficients of the sample, the uncertainty in CDOM absorption coefficients arises from both the uncertainty in the volume of  $\text{NaN}_3$  added, and the uncertainty in the volume of the water sample collected in the field. We collected 30 ml of water per sample by filling a 40-mL borosilicate EPA vial to an identical pre-determined height (owing to the size of the filtration flask, pipetting the sample water was not possible). We determined the uncertainty in sample volume empirically by filling eleven replicate vials with this method and measuring the weight of water. We found that the uncertainty in the water sample weight is  $\pm 1.4\%$ . For each water sample, 150  $\mu\text{L}$   $\text{NaN}_3$  was added using a 100-1000  $\mu\text{L}$  pipette, which introduces a random error of up to  $\pm 0.6\%$  (Operating manual, Eppendorf Research plus, [www.eppendorf.com](http://www.eppendorf.com)). Propagating these two errors gives an uncertainty in the  $\text{NaN}_3$  concentration in each 30-mL water sample of about  $\pm 1.5\%$ .

## 2.2 Uncertainty in $\text{SUVA}_{254}$

The  $\text{SUVA}_{254}$  was calculated using equation (1):

$$\text{SUVA}_{254} = \frac{(\text{total decadic absorption coefficient} - \text{NaN}_3 \text{ decadic absorption coefficient})_{\lambda=254\text{nm}}}{\text{DOC concentration}} \quad (1)$$

The DOC concentration has an uncertainty of around  $\pm 4.3\%$ , given the long-term mean  $\pm 1\text{SD}$  of  $47 \pm 2.0 \mu\text{mol L}^{-1}$  of DOC in the certified deep-sea water measured in our lab (Martin et al., 2018). The uncertainty in  $\text{NaN}_3$  concentration of  $\pm 1.5\%$  equates to an uncertainty in the  $\text{NaN}_3$  decadic absorption coefficient at 254 nm of  $0.06 \text{ m}^{-1}$  for each sample. By propagating these errors for each individual sample, we estimate that the uncertainty in  $\text{SUVA}_{254}$  of our samples is always within the range of  $\pm 10\%$ , and mostly less than  $\pm 5\%$  (Figure 2).

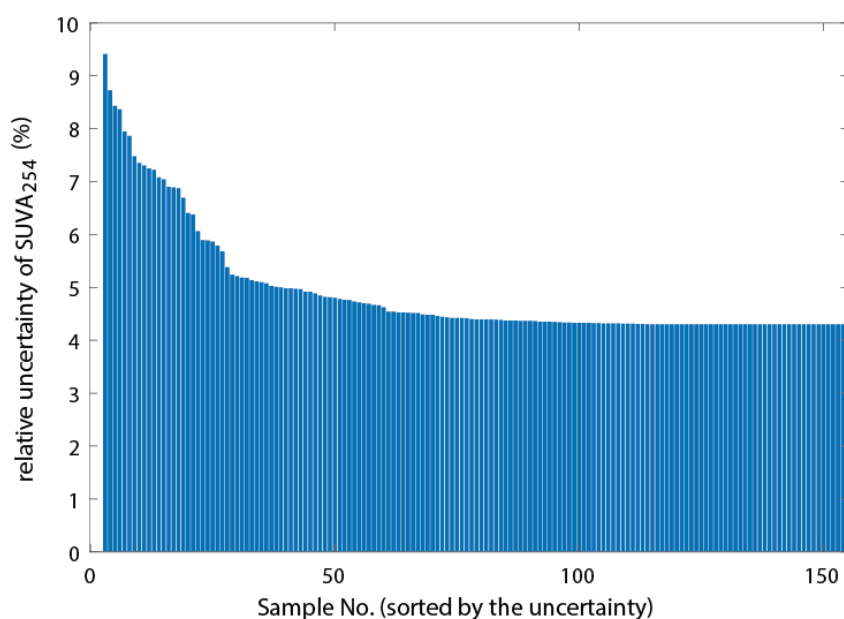

Figure 2. Relative uncertainty in  $\text{SUVA}_{254}$  for each sample, based on propagating the estimated uncertainty in DOC concentration and in the decadic absorption coefficient of the  $\text{NaN}_3$  blank.

### 2.3 Effects of uncertainty of $\text{NaN}_3$ concentration on $S_{275-295}$

Because  $\text{NaN}_3$  still absorbs in the wavelength range of 275–295 nm, the uncertainty in  $\text{NaN}_3$  concentration also contributes uncertainty to the calculated spectral slope  $S_{275-295}$ . To estimate this uncertainty, we changed the CDOM absorption spectrum of every sample by adding or subtracting 1.5% of the  $\text{NaN}_3$  blank for the appropriate wavelength, and recalculated  $S_{275-295}$ . Note that any variation in  $\text{NaN}_3$  blank is necessarily correlated across wavelengths, *i.e.*, if a sample contains 1.5% more  $\text{NaN}_3$  than average, then the absorption at every wavelength is greater by 1.5% of the blank absorption spectrum; the variation cannot be randomly  $\pm 1.5\%$  within a sample. The relative uncertainty in spectral slope is therefore potentially less than the relative uncertainty in  $\text{NaN}_3$  concentration.

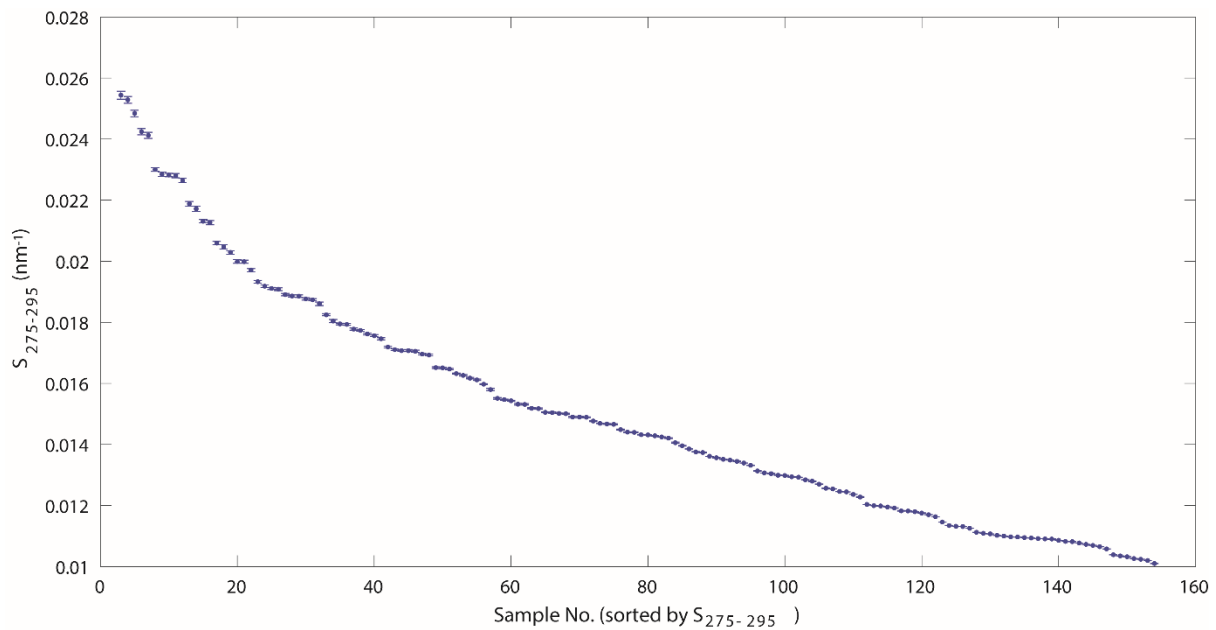

Figure 3. Effects of changing  $\text{NaN}_3$  blank absorption by  $\pm 1.5\%$  on  $S_{275-295}$  of CDOM for all individual samples. Dots indicate the original estimate of  $S_{275-295}$ , error bars show the effect of having a  $\text{NaN}_3$  blank that is higher or lower by 1.5% than the mean blank.

This analysis indicates that the uncertainty in the  $\text{NaN}_3$  concentration only has a very small effect on  $S_{275-295}$ : the relative change compared to the originally calculated  $S_{275-295}$  is always below 0.5% (Figure 3). The impact is greatest for those samples with the highest  $S_{275-295}$  (because these samples had the lowest CDOM absorption values), but decreases even further for samples with lower  $S_{275-295}$  values.

### 3. Conclusion

Our analysis of uncertainty demonstrates that the CDOM data used in this study and in Martin et al. (2018) were not significantly impacted by the use of  $\text{NaN}_3$  as a preservative. This is because the variation in  $\text{NaN}_3$  concentration in the samples was small, and the high blank at wavelengths below 300 nm could therefore be subtracted with high accuracy.

## References

- Martin, P., Cherukuru, N., Tan, A. S. Y., Sanwlani, N., Mujahid, A. and Müller, M.: Distribution and cycling of terrigenous dissolved organic carbon in peatland-draining rivers and coastal waters of Sarawak, Borneo, *Biogeosciences*, 15(22), 6847–6865, doi:10.5194/bg-15-6847-2018, 2018.
- McDonald, J. R., Rabalais, J. W. and McGlynn, S. P.: Electronic Spectra of the Azide Ion, Hydrazoic Acid, and Azido Molecules, *J. Chem. Phys.*, 52(3), 1332–1340, doi:10.1063/1.1673134, 1970.
