# Supplementary material for: Composition and cycling of dissolved organic matter from tropical peatlands of coastal Sarawak, Borneo, revealed by fluorescence spectroscopy and parallel factor analysis
Source: Copernicus journal article supplement (doi:10.5194/bg-16-2733-2019), 2019-07-12
Supplement: Supplementary file 4 [file bg-16-2733-2019-supplement.zip]

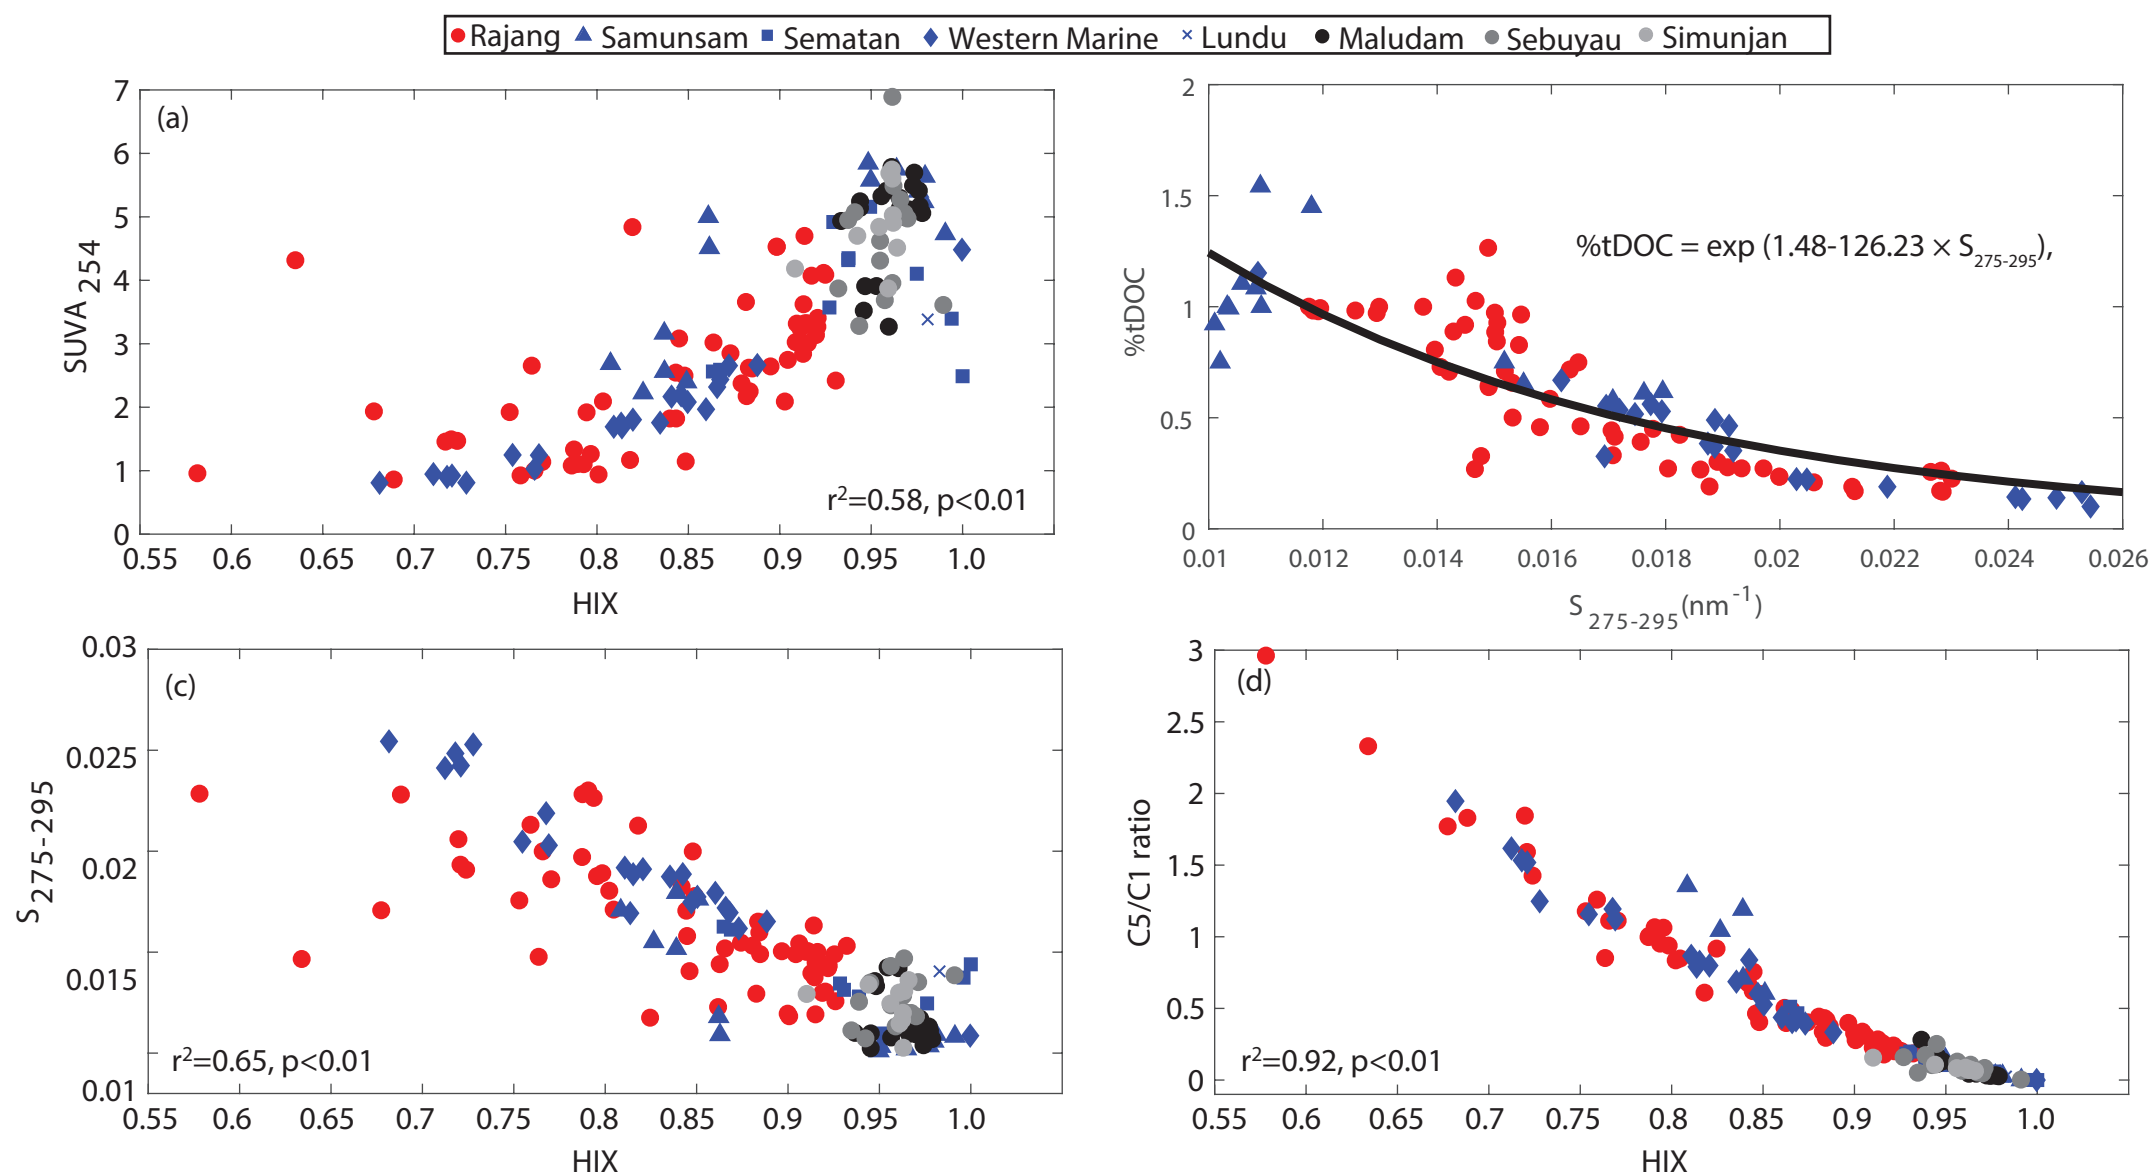

Figure S1. Correlations between (a) SUVA<sub>254</sub> and HIX, (b) between  $S_{275-295}$  and estimated %DOC, (c) between  $S_{275-295}$  and HIX, (d) between C5/C1 Fmax ratio and HIX. Correlations in panel (a), (c), (d) were calculated as Pearson's correlation. In panel (b), the observation data is plotted using circles and the exponential regression model is presented by the black solid line.
