# Supplementary material for: Composition and cycling of dissolved organic matter from tropical peatlands of coastal Sarawak, Borneo, revealed by fluorescence spectroscopy and parallel factor analysis
Source: Copernicus journal article supplement (doi:10.5194/bg-16-2733-2019), 2019-07-12
Supplement: Supplementary file 5 [file bg-16-2733-2019-supplement.zip]

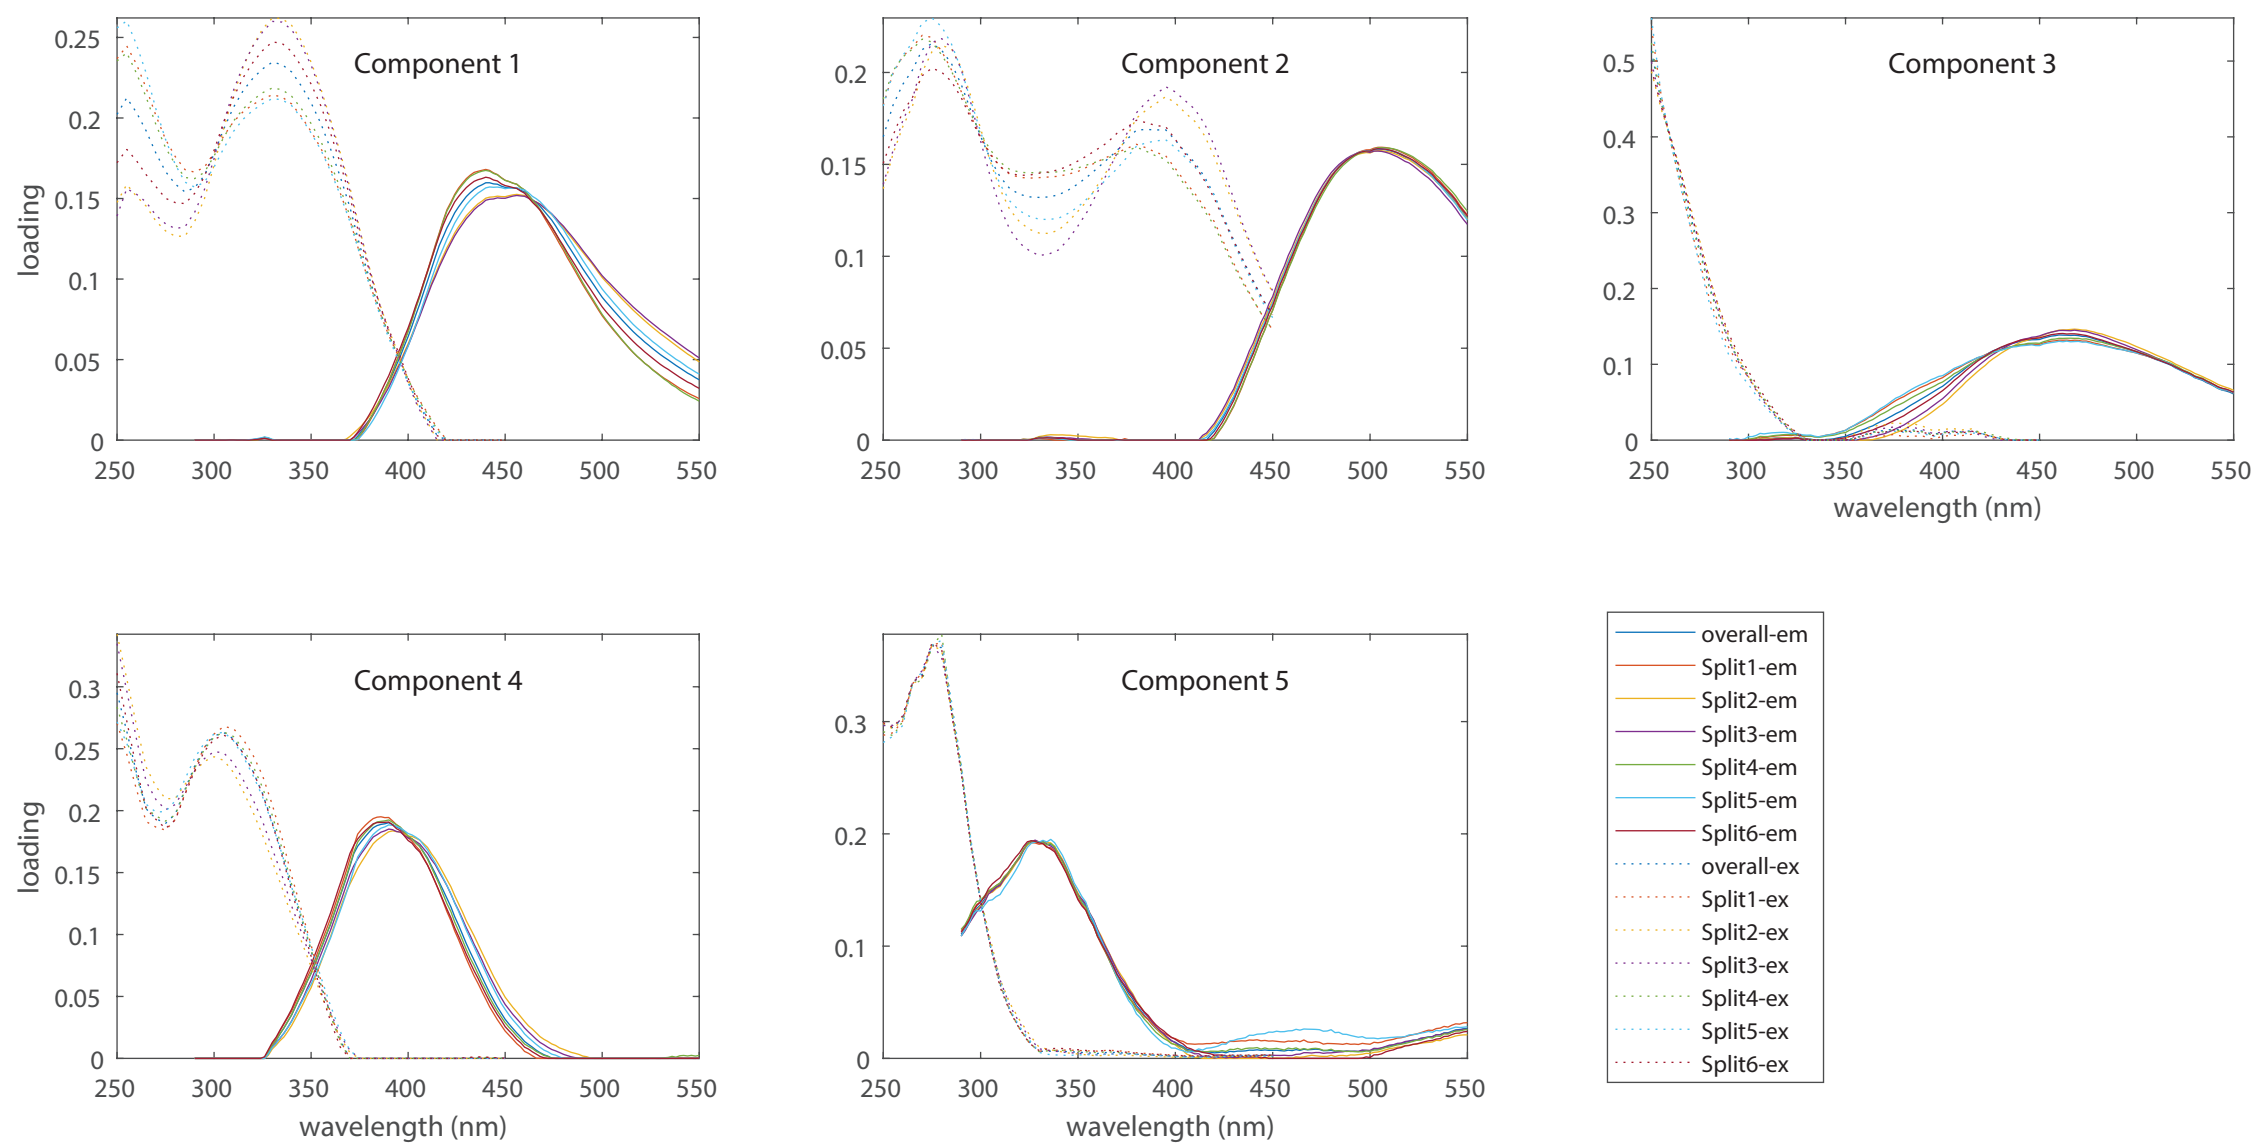

Figure S4. Spectral loadings of the excitation spectra and emission spectra of five components of the plit dataset.
