# Supplementary figures and images for: Composition and cycling of dissolved organic matter from tropical peatlands of coastal Sarawak, Borneo, revealed by fluorescence spectroscopy and parallel factor analysis
Source: Copernicus journal article supplement (doi:10.5194/bg-16-2733-2019), 2019-07-12

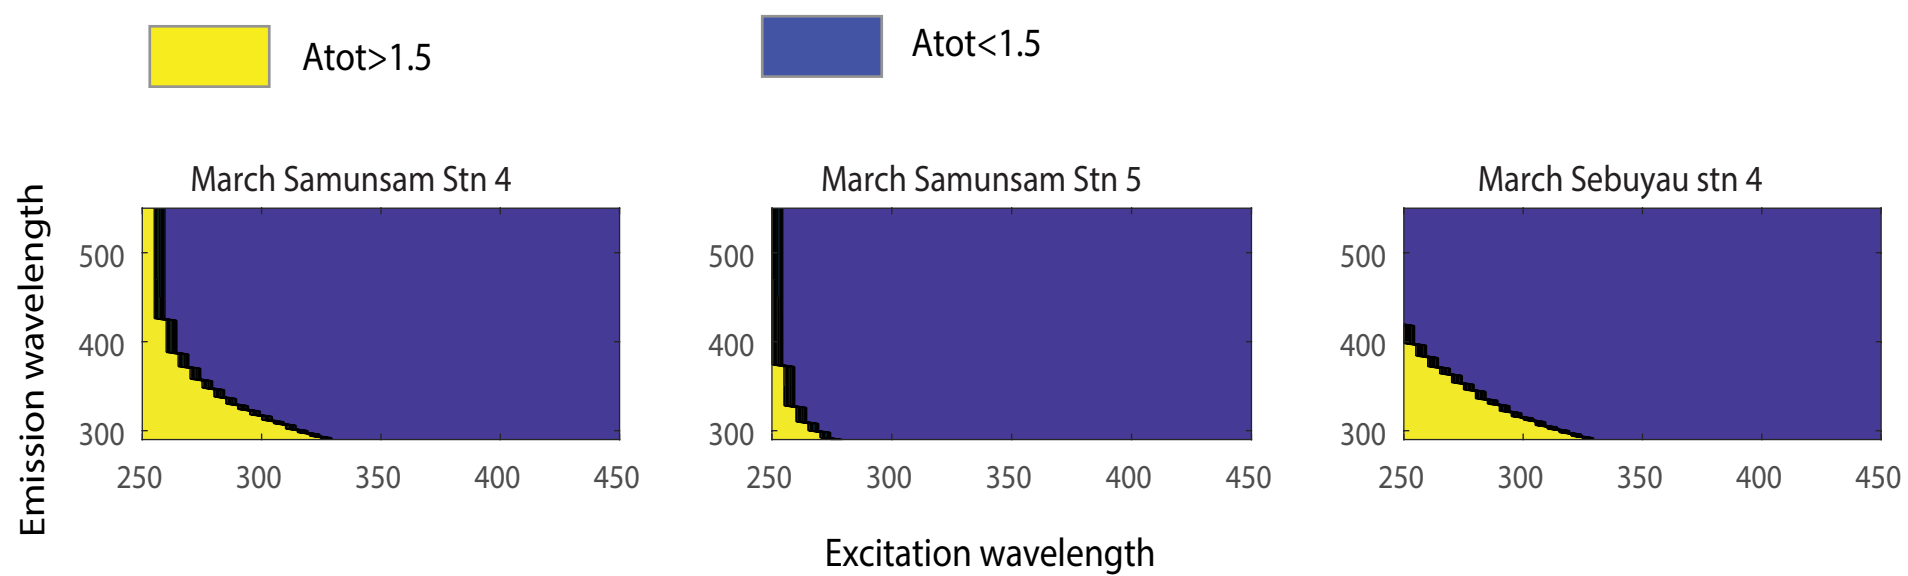

Figure S3. The  $A_{\text{total}}$  display on EEMs of three samples with  $A_{\text{total}}$  higher than 1.5.

Supplement: Supplementary file 2 [file bg-16-2733-2019-supplement.zip]
